# Supplementary material for: Systematic mapping of protein‐metabolite interactions in central metabolism of Escherichia coli
Source: PubMed Central journal article supplement (PMC6706640; doi:10.15252/msb.20199008), 2019-08-23
Supplement: MSB-15-e9008-s001.pdf [file MSB-15-e9008-s001.pdf]

## Appendix

*Systematic mapping of protein-metabolite interactions in central metabolism of Escherichia coli.*

Maren Diether, Yaroslav Nikolaev, Frédéric H.T. Allain, Uwe Sauer

### Table of Contents

| Item                | Title                                                                                                | Page |
|---------------------|------------------------------------------------------------------------------------------------------|------|
| Appendix Figure S1  | Reference spectra for metabolite mix 1.                                                              | 2    |
| Appendix Figure S2  | Reference spectra for metabolite mix 2.                                                              | 3    |
| Appendix Figure S3  | Reference spectra for metabolite mix 3.                                                              | 4    |
| Appendix Figure S4  | Reference spectra for metabolite mix 4.                                                              | 5    |
| Appendix Figure S5  | Receiver-operator characteristics curve for the recovery of known interactions.                      | 6    |
| Appendix Figure S6  | Number of detected interactions per enzyme.                                                          | 7    |
| Appendix Figure S7  | Number of detected interactions per enzyme versus native protein size.                               | 8    |
| Appendix Figure S8  | Correlation of protein and metabolite hydrophobicity with number of detected interactions.           | 9    |
| Appendix Figure S9  | Chemical similarity of new and known interactions.                                                   | 10   |
| Appendix Figure S10 | Comparison between <i>in vivo</i> and <i>in vitro</i> metabolite concentrations.                     | 11   |
| Appendix Figure S11 | Correlation of interactions detected per enzyme and metabolite in this study and Piazza et al. 2018. | 12   |
| Appendix Figure S12 | SDS-PAGE of all tested proteins.                                                                     | 13   |
| Appendix Figure S13 | Raw data for enzyme assays with Pta and FbaA.                                                        | 14   |

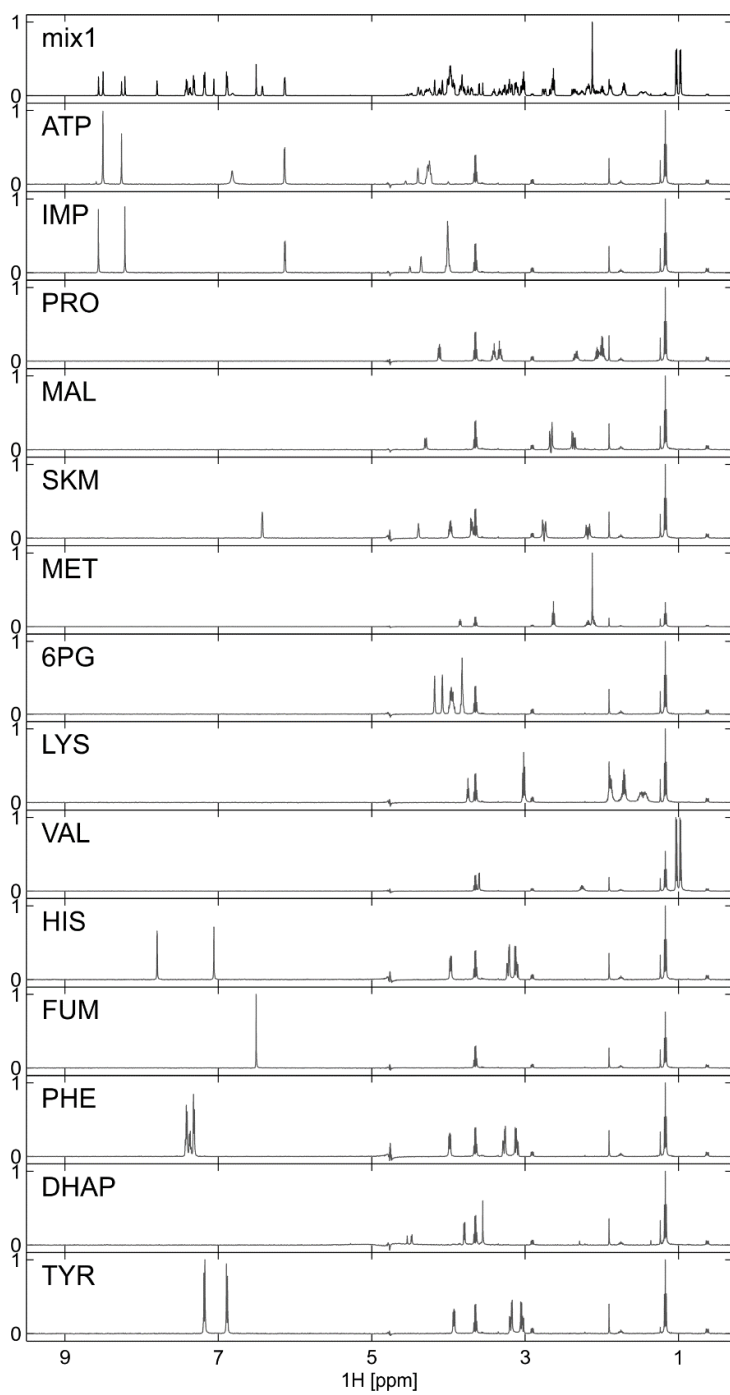

**Appendix Figure S1: Reference spectra for metabolite mix 1.**

1D <sup>1</sup>H-NMR spectra of metabolite mix 1 and the individual metabolites contained therein.

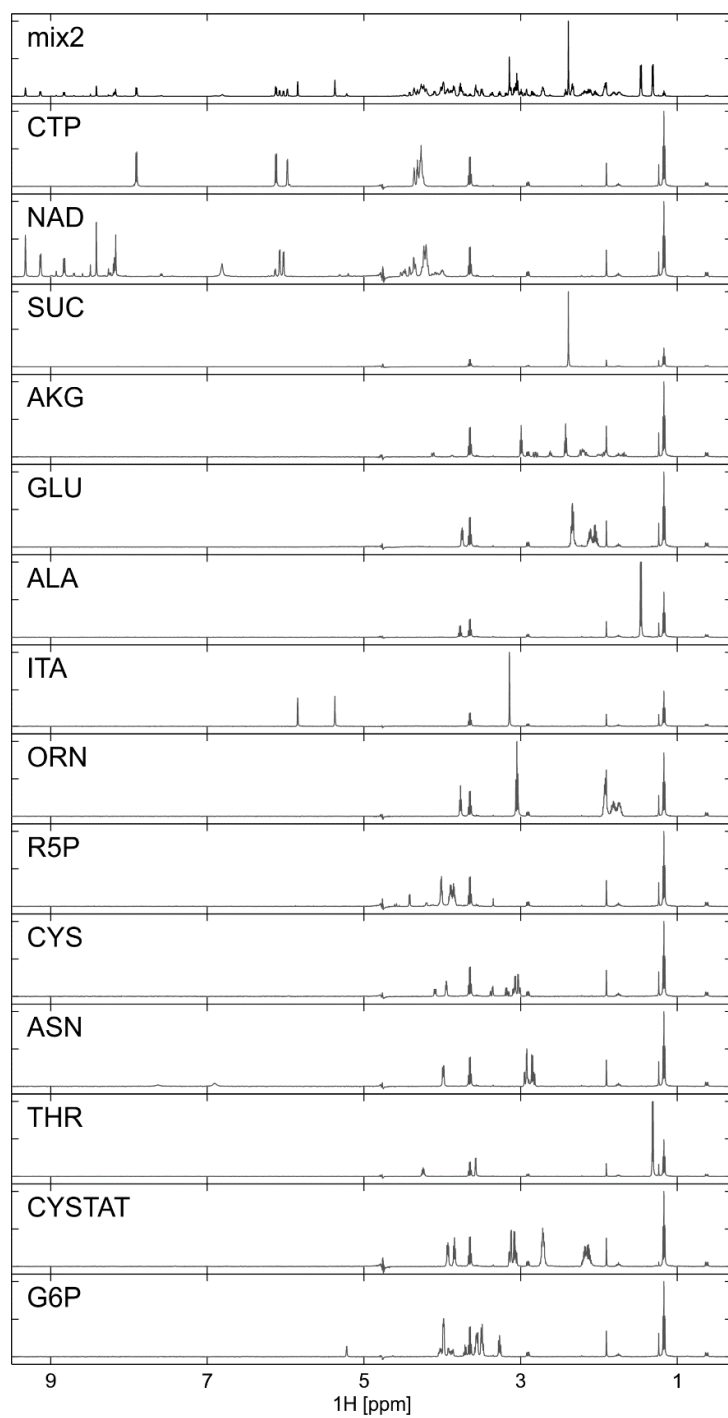

**Appendix Figure S2: Reference spectra for metabolite mix 2.**

1D <sup>1</sup>H-NMR spectra of metabolite mix 2 and the individual metabolites contained therein.

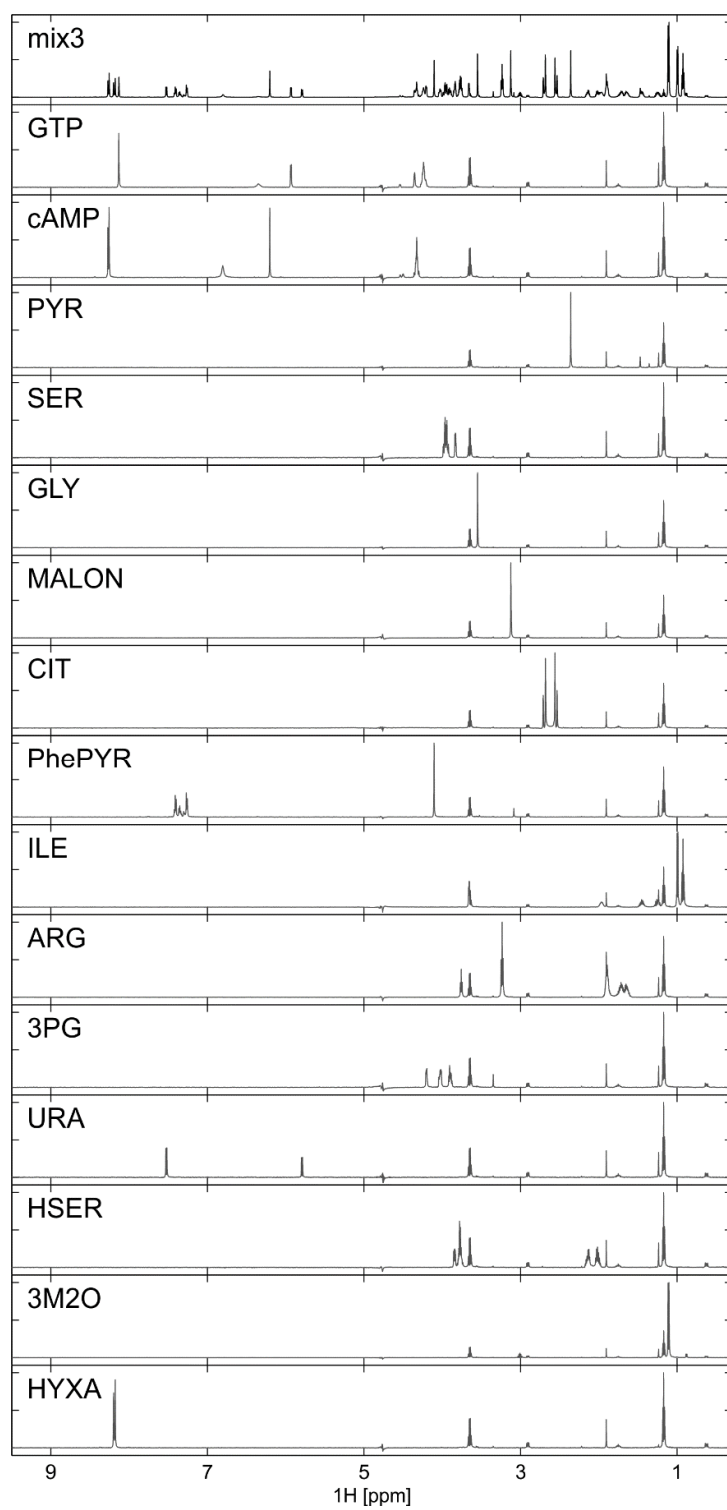

**Appendix Figure S3: Reference spectra for metabolite mix 3.**

1D <sup>1</sup>H-NMR spectra of metabolite mix 3 and the individual metabolites contained therein.

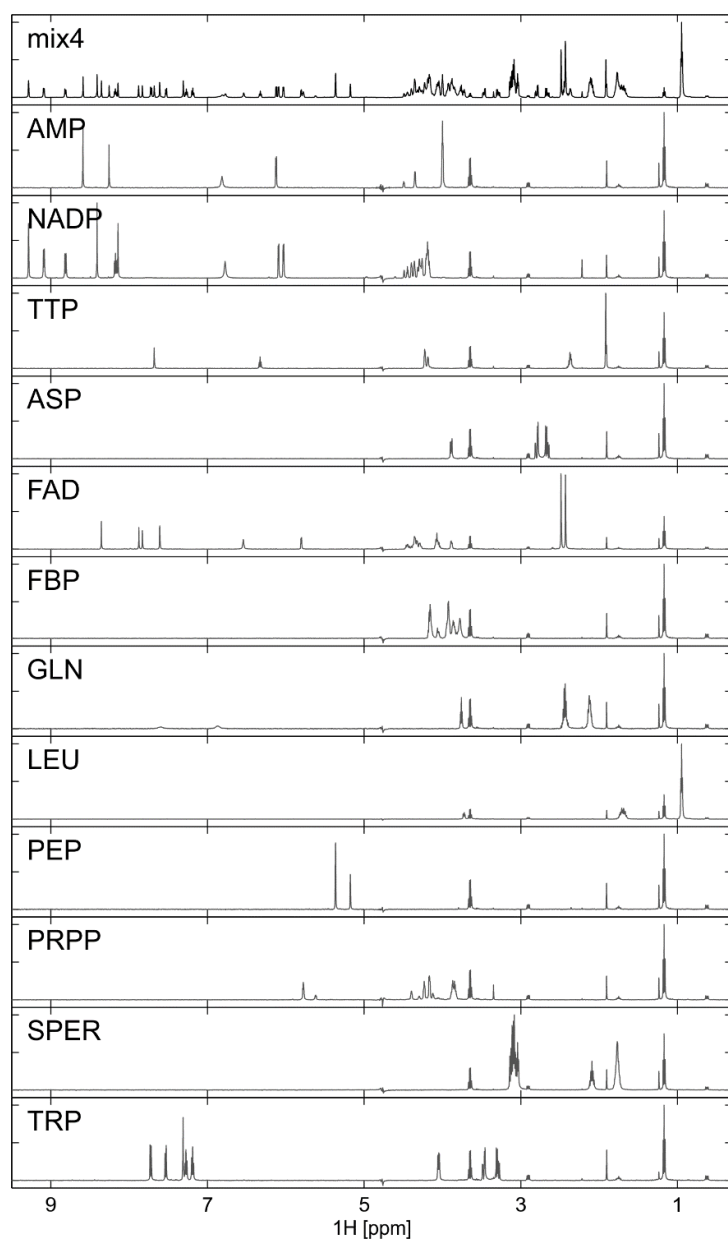

**Appendix Figure S1: Reference spectra for metabolite mix 4.**

1D <sup>1</sup>H-NMR spectra of metabolite mix 4 and the individual metabolites contained therein.

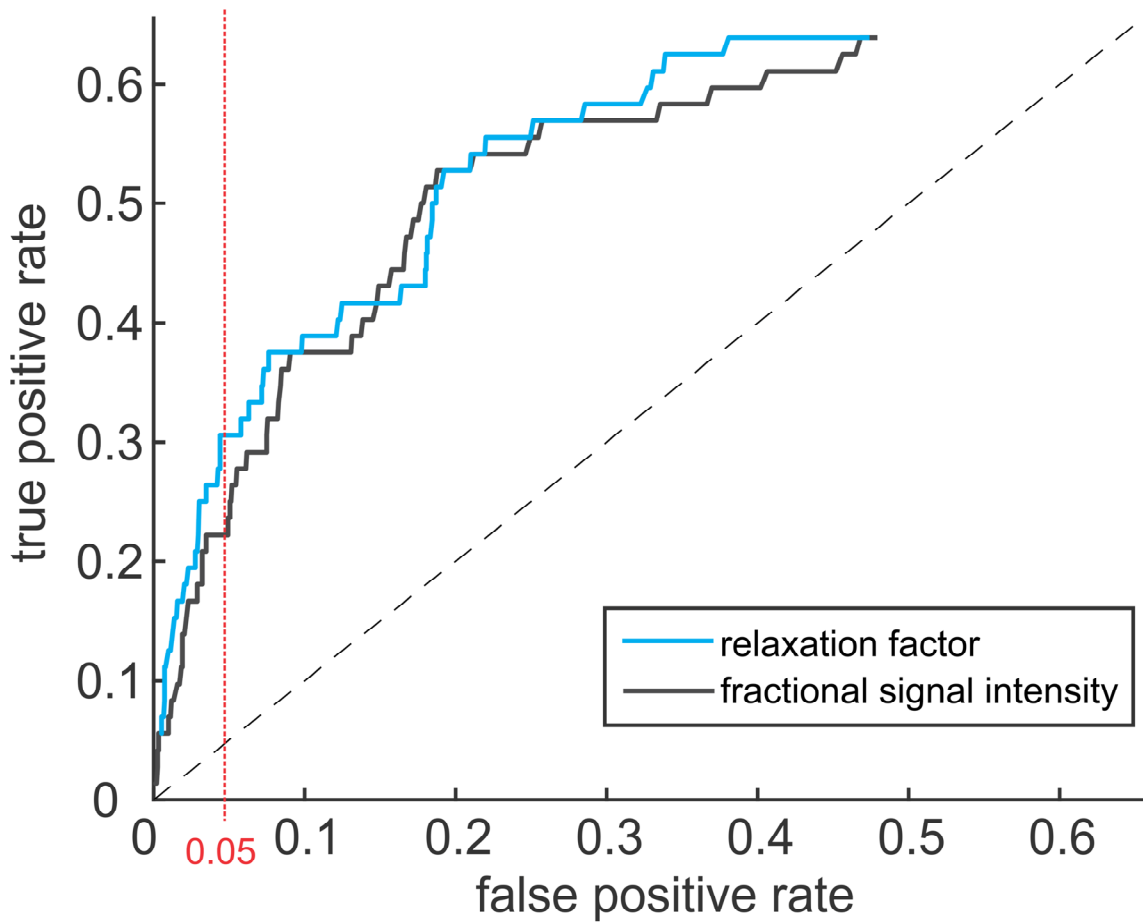

**Appendix Figure S5: Receiver-operator characteristics curve for the recovery of known interactions.**

The false-positive and true-positive rates of recovering known interactions from EcoCyc were calculated for different cutoffs of the relaxation factor  $\Delta RF$  (blue line) and the fractional signal intensity (black line).

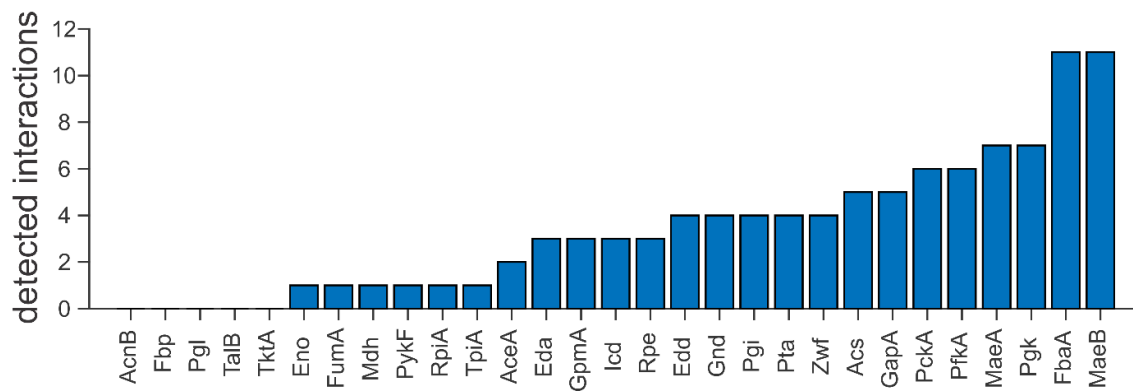

**Appendix Figure S6: Number of detected interactions per enzyme.**

The height of the bars indicate the number of interactions detected with NMR.

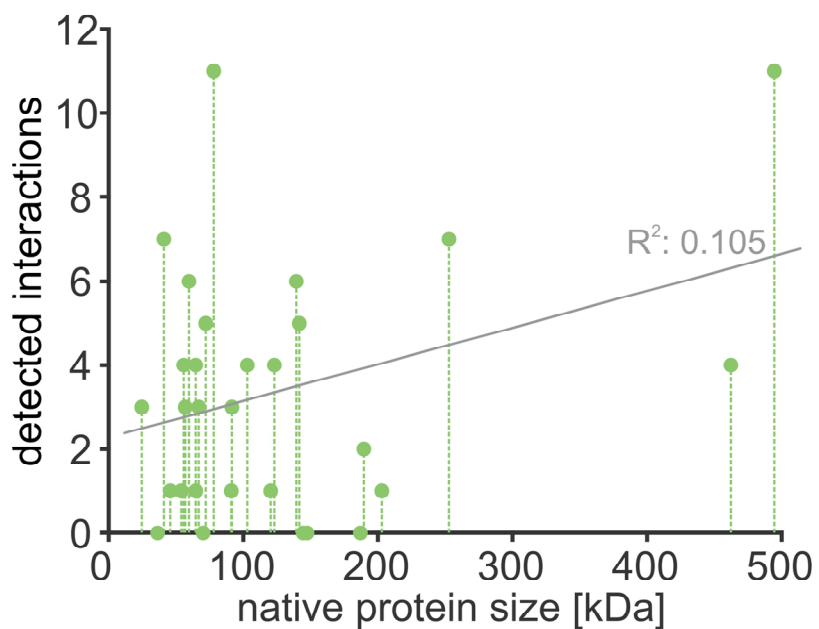

**Appendix Figure S7: Number of detected interactions per enzyme versus native protein size.**

The detected interactions per protein ( $\Delta RF > 0.1805$ ) are plotted against the native protein size. The grey line represents a linear fit with  $R^2 = 0.105$ .



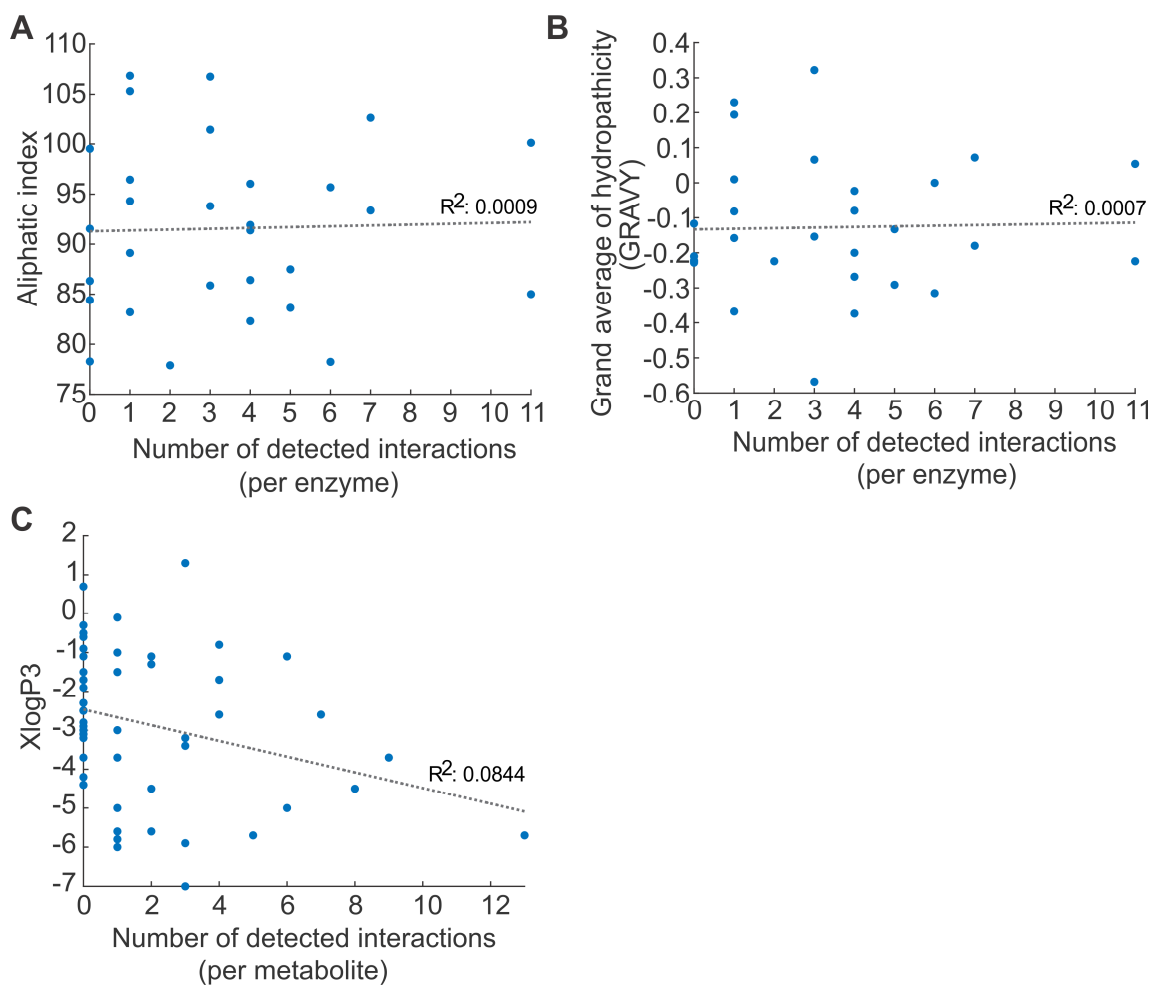

**Appendix Figure S8: Correlation of protein and metabolite hydrophobicity with number of detected interactions.**

**A**, Correlation of protein aliphatic index (from sequence level analysis) with the number of detected interactions per protein. The grey dotted line represents a linear fit with  $R^2 = 0.0009$ .

**B**, Correlation of protein grand average of hydropathicity (from sequence level analysis) with the number of detected interactions per protein. The grey dotted line represents a linear fit with  $R^2 = 0.0007$ .

**C**, Correlation of metabolite lipophilicity (XLogP3, from PubChem) with the number of detected interactions per metabolite. The grey dotted line represents a linear fit with  $R^2 = 0.0844$ .

Interactions with chemical similarity  $\leq 0.5$

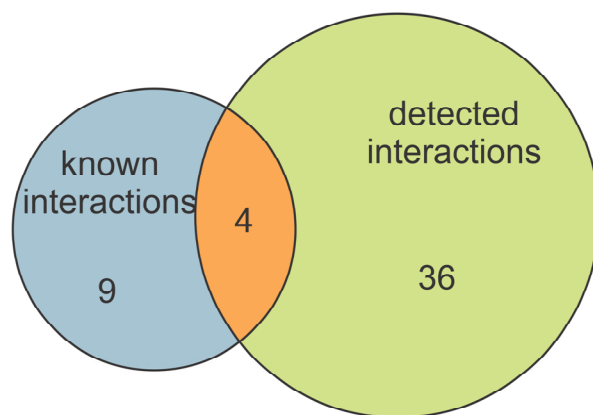

Interactions with chemical similarity  $> 0.5$

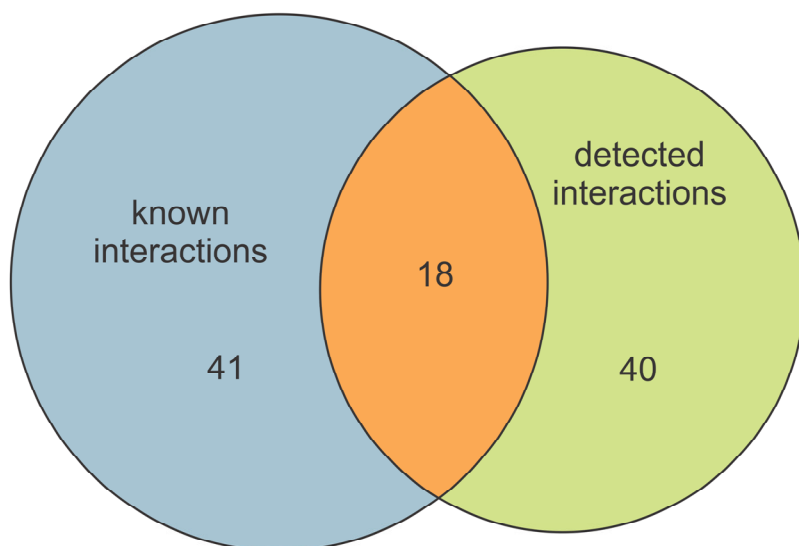

**Appendix Figure S9: Chemical similarity of new and known interactions.**

For metabolite enzyme-interactions with a score above 0.5 and below 0.5 the number of known, known and detected and newly detected interactions is presented in blue, orange and green respectively.

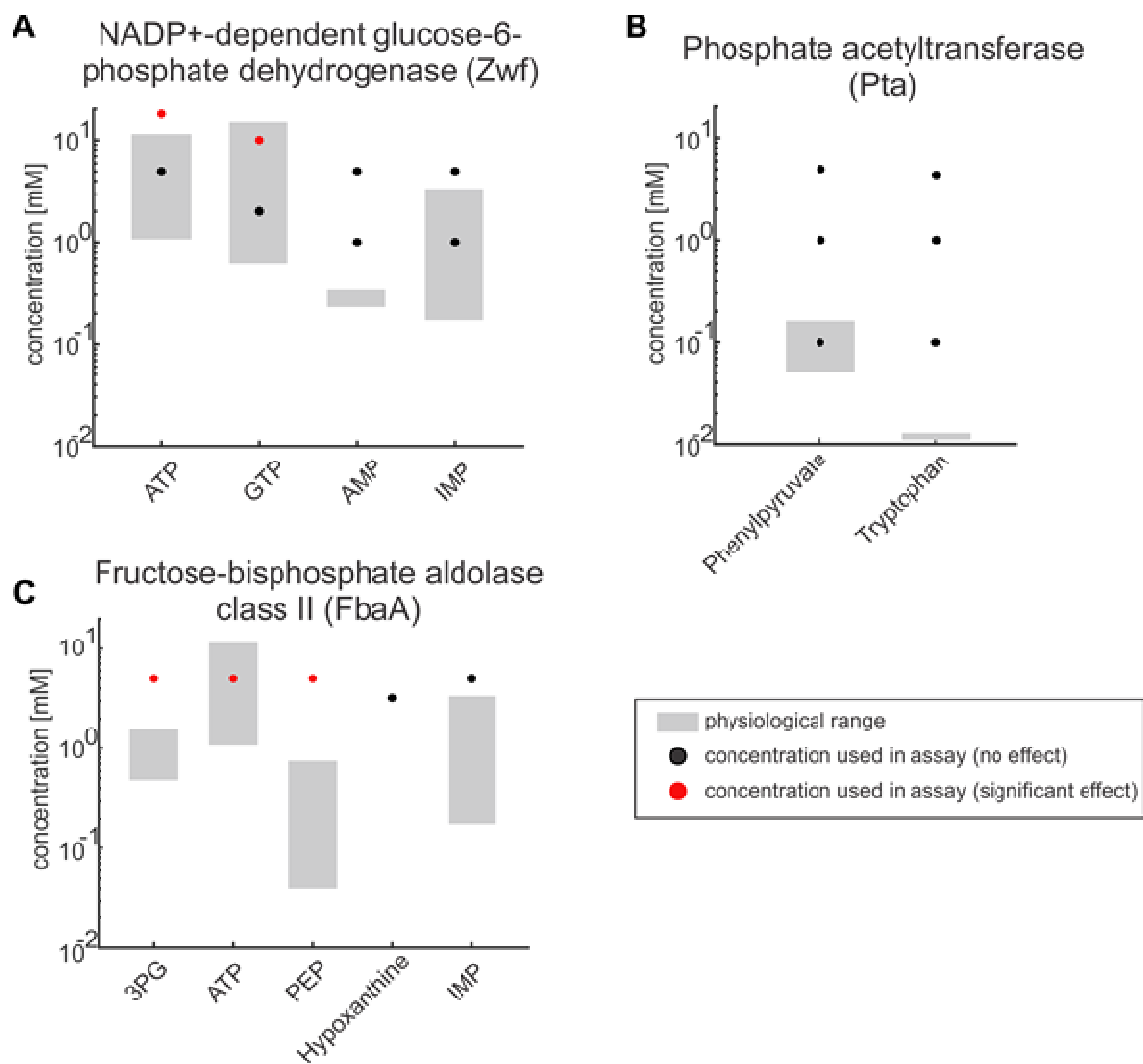

**Appendix Figure S10: Comparison between *in vivo* and *in vitro* metabolite concentrations.**

The grey bar denotes the *in vivo* steady state concentrations of all metabolites used in *in vitro* enzyme assays. Data was extracted from Park et al, 2016 and Kochanowski et al, 2017, for hypoxanthine, no *in vivo* concentration was available.

A, *In vivo* and *in vitro* metabolite concentrations for enzyme assay with NADP<sup>+</sup>-dependent glucose-6-phosphate dehydrogenase.

B, *In vivo* and *in vitro* metabolite concentrations for enzyme assay with phosphate acetyltransferase.

C, *In vivo* and *in vitro* metabolite concentrations for enzyme assay with fructose-bisphosphate aldolase class II.

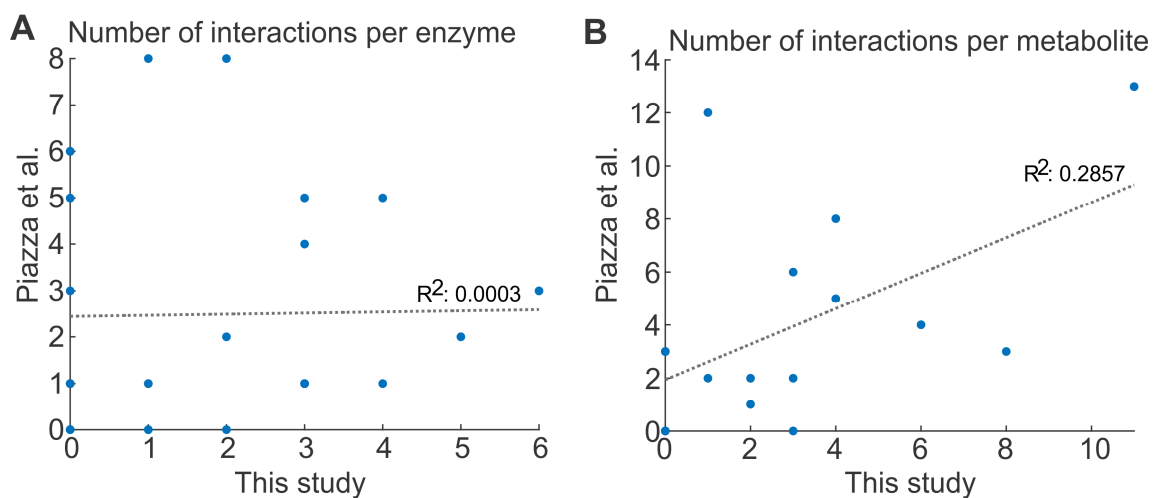

**Appendix Figure S11: Correlation of interactions detected per enzyme and metabolite in this study and Piazza et al. 2018.**

**A**, Correlation of the number of interactions detected per protein. The grey dotted line represents a linear fit with  $R^2 = 0.0003$ .

**B**, Correlation of the number of interactions detected per metabolite. The grey dotted line represents a linear fit with  $R^2 = 0.2857$ .

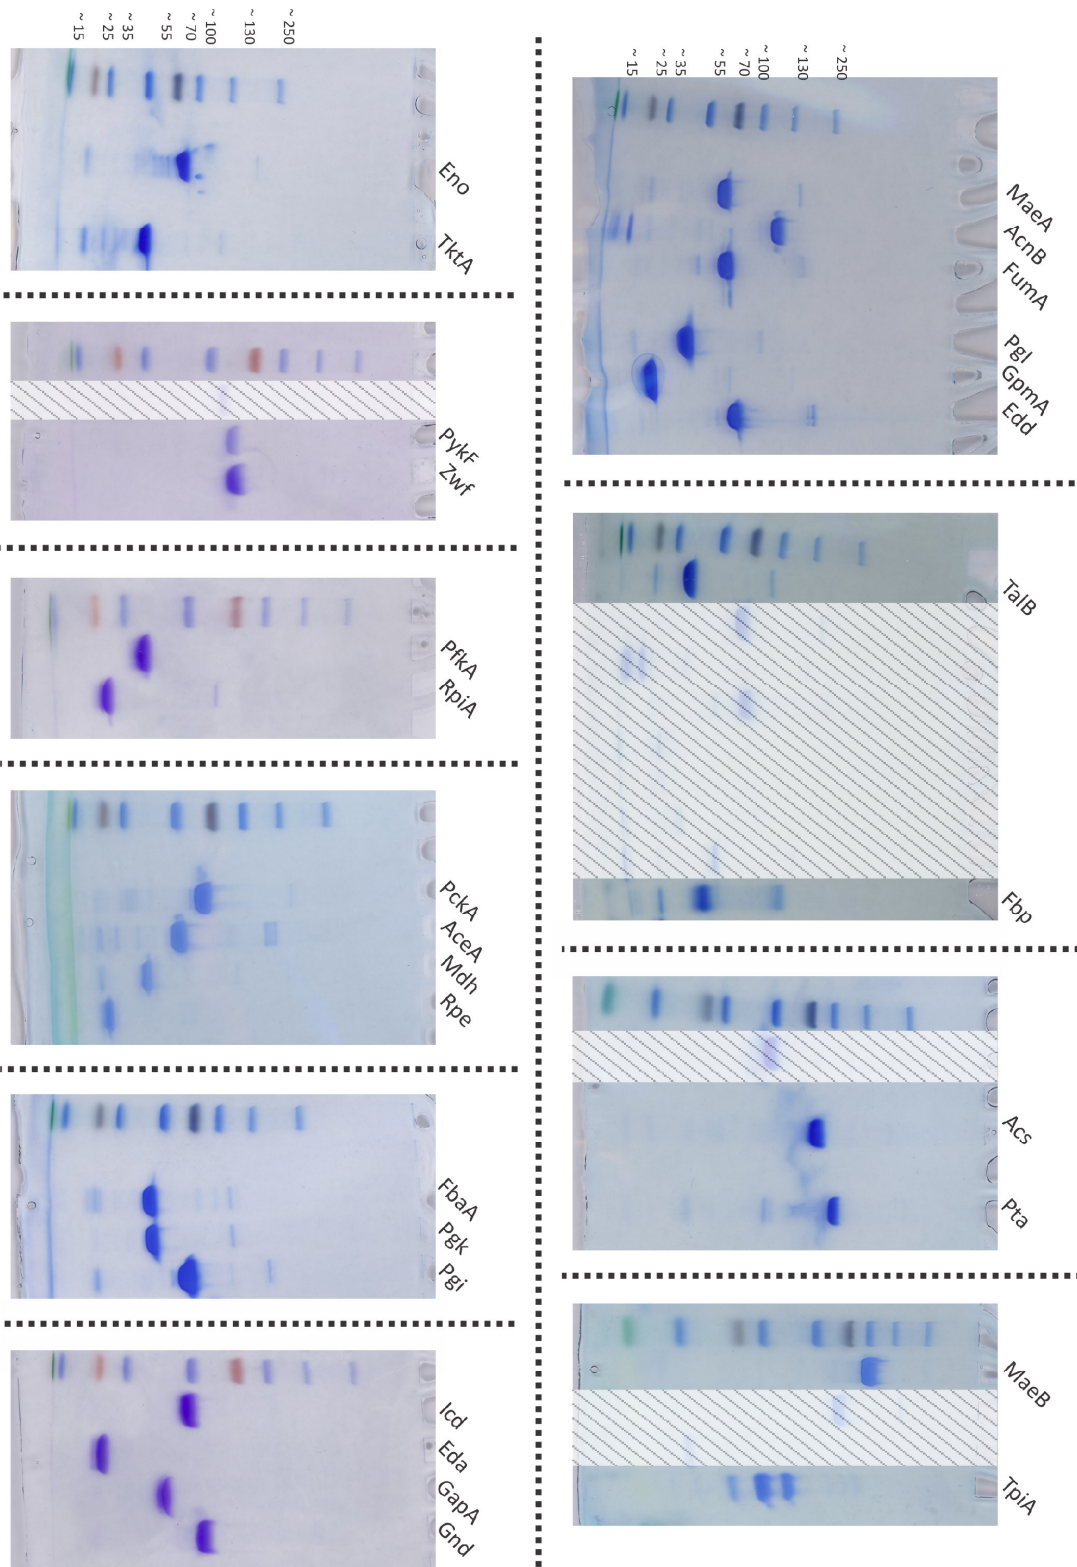

**Appendix Figure S12: SDS-PAGE of all tested proteins.**

The approximate marker sizes are indicated in kDa (Precision Plus Protein Dual Color standard, Bio-Rad).

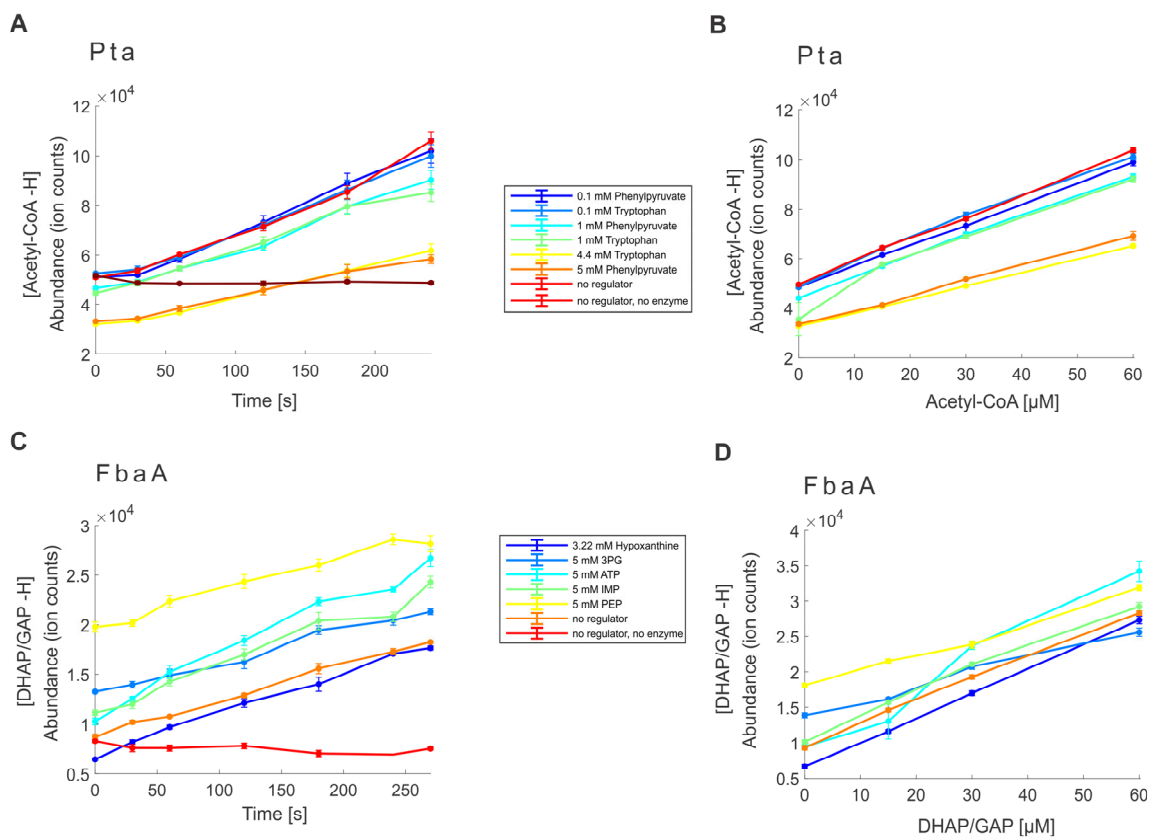

**Appendix Figure S13: Raw data for enzyme assays with Pta and FbaA.**

**A,** Increase of acetyl-CoA (product of Pta) over time, n= 3.

**B,** Standard curve for acetyl-CoA in the presence of different amounts of inhibitors (without added enzyme).

**C,** Increase of dihydroxyacetone phosphate/ glyceraldehyde-3-phosphate (products of FbaA) over time, n= 3.

**D,** Standard curve for dihydroxyacetone phosphate/ glyceraldehyde-3-phosphate in the presence of different amounts of inhibitors (without added enzyme).
